# Supplementary material for: 2-Isopropyl-1,3-dimethylimidazolium as a versatile structure-directing agent in the synthesis of zeolites
Source: Royal Society of Chemistry journal article supplement (doi:10.1039/d3dt02414h), 2023-01-01
Supplement: d3dt02414h1.pdf [file d3dt02414h1.pdf]

## Supplementary Information for

### **2-isopropyl-1,3-dimethylimidazolium as a versatile structure-directing agent in the synthesis of zeolites**

Huajian Yu, Alex Rojas, Zihao Rei Gao, Luis Gómez-Hortigüela, Luis A. Villaescusa, Jian Li,  
Jean-Louis Paillaud and Miguel A. Cambor

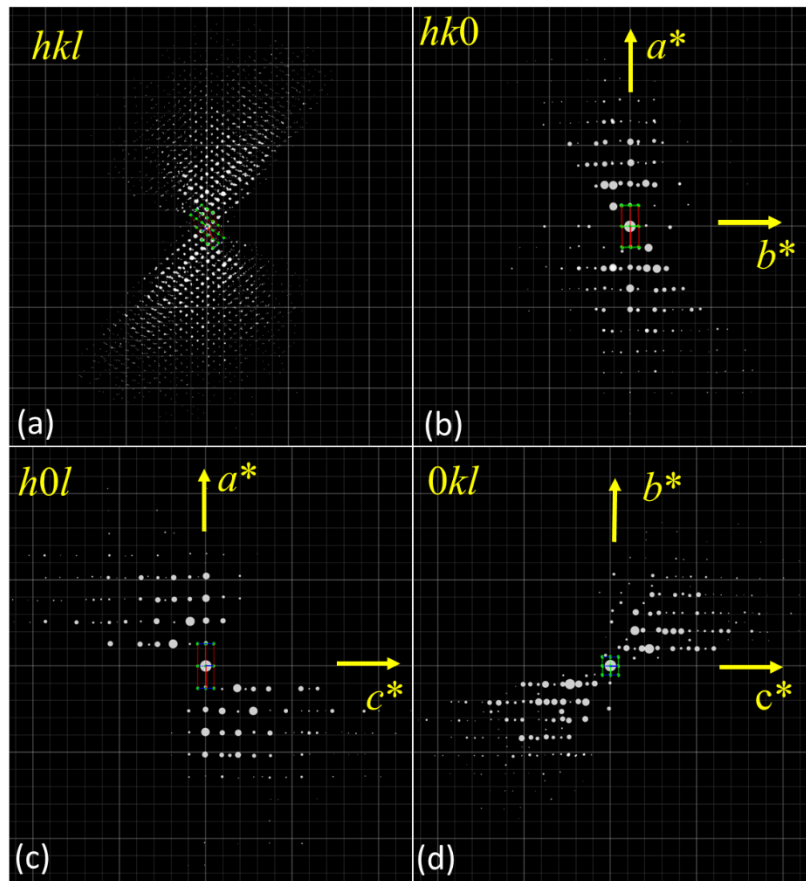

Figure S1 (a) Projection of 3D reciprocal space reconstructed from the typical cRED data of HPM-6 collected at 96K. The 2D slices of  $hk0$  (b),  $h0l$  (c), and  $0kl$  (d). The data indicate a *Pbcm* symmetry.

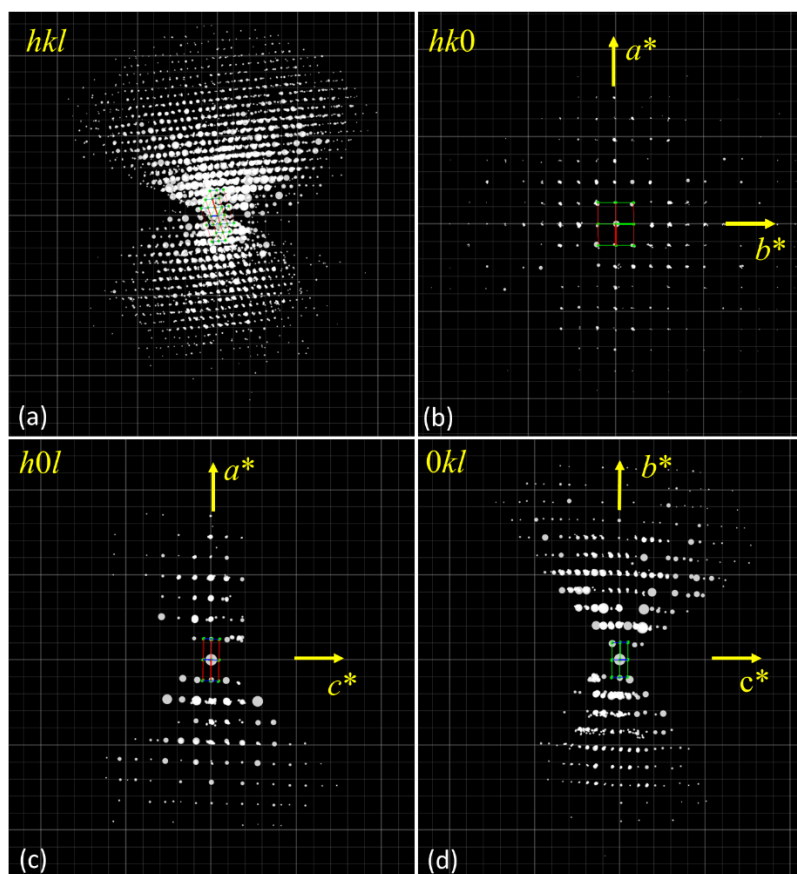

Figure S2 (a) Projection of 3D reciprocal space reconstructed from the typical cRED data of HPM-11 collected at 96K. The 2D slices of  $hk0$  (b),  $h0l$  (c), and  $0kl$  (d). The data indicate a  $Pmcm$  cell at this temperature (please note that the PXRD data collected at room temperature indicate a  $Pbcm$  symmetry with double  $b$ ).

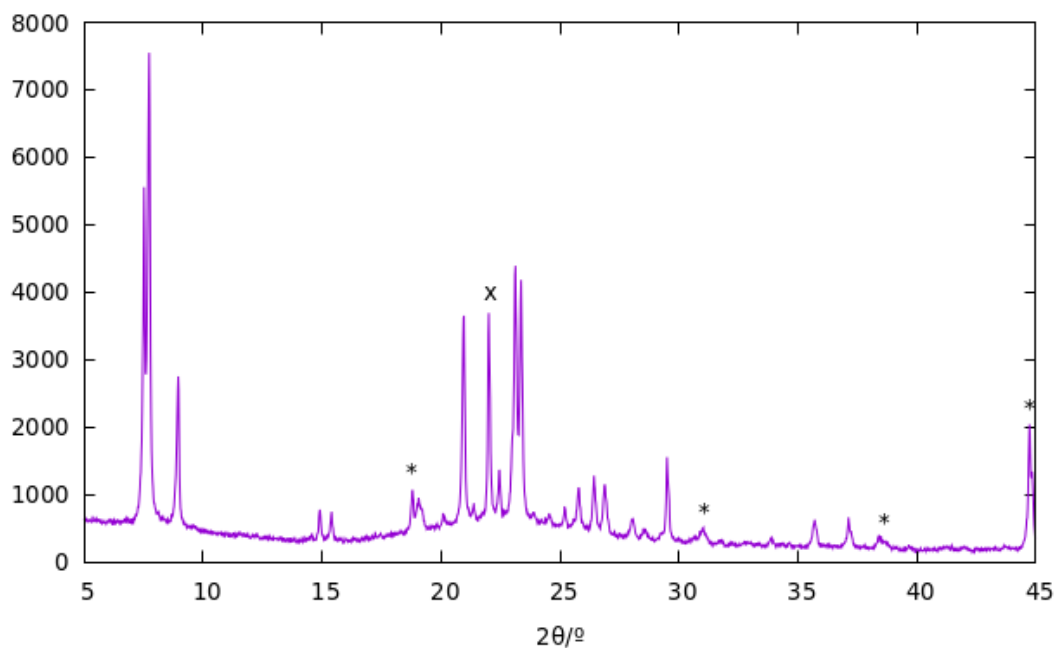

Figure S3.- PXRD pattern of the product obtained using 2iPr13DMI synthesized by method A at  $\text{H}_2\text{O}/\text{SiO}_2 = 6.5$ , consisting mainly on **MTW**,  $\text{K}_2\text{SiF}_6$  (\*) and cristobalite (x).

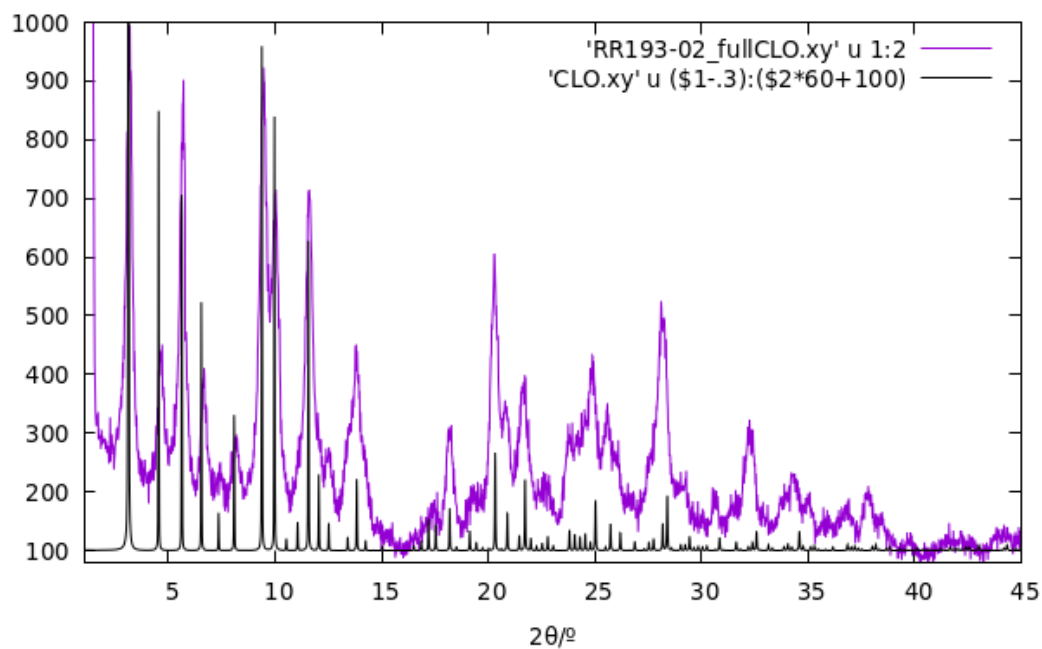

Figure S4. PXRD pattern of HPM-10 sample synthesized with 2iPr13DMI and comparison with a pattern simulated using VESTA and the **-CLO** cif file provided by the IZA-SC database.

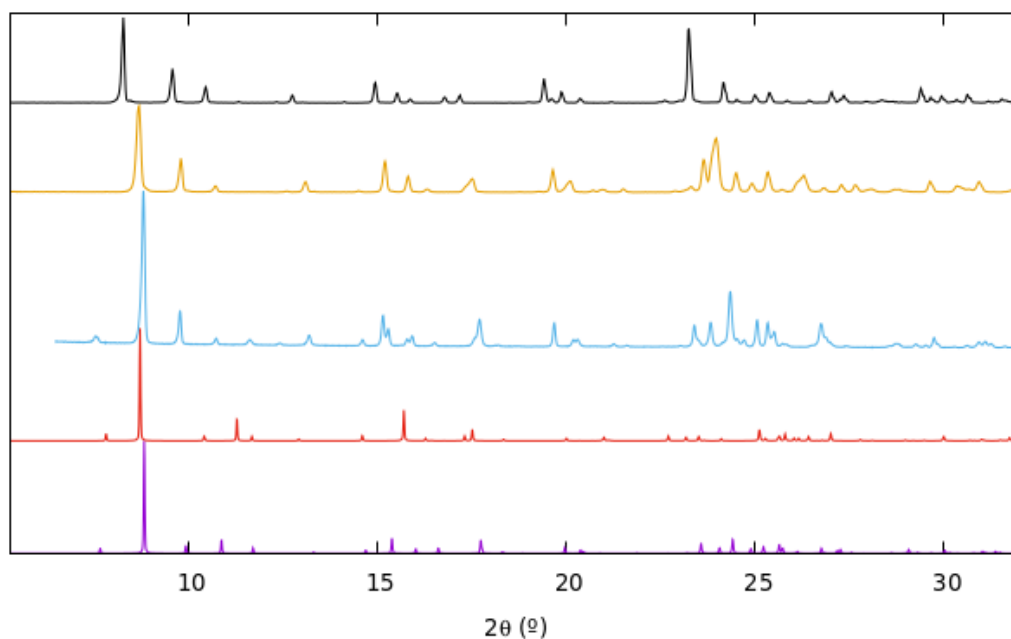

Figure S5. PXRD patterns of **UOS** and related materials (from bottom): IM-16 (**UOS** reference material) and ECNU-16 (**EOS**, UOS-related), both simulated with VESTA using the cif file from the IZA-SC database [ref. 21 in main text] and the reported structure [ref. 46 in main text], respectively, and experimental as-made IM-16 ( $Ge_f=0.43$ ), HPM-11 ( $Ge_f=0.66$ ) and HPM-6 ( $Ge_f=1$ ) patterns.

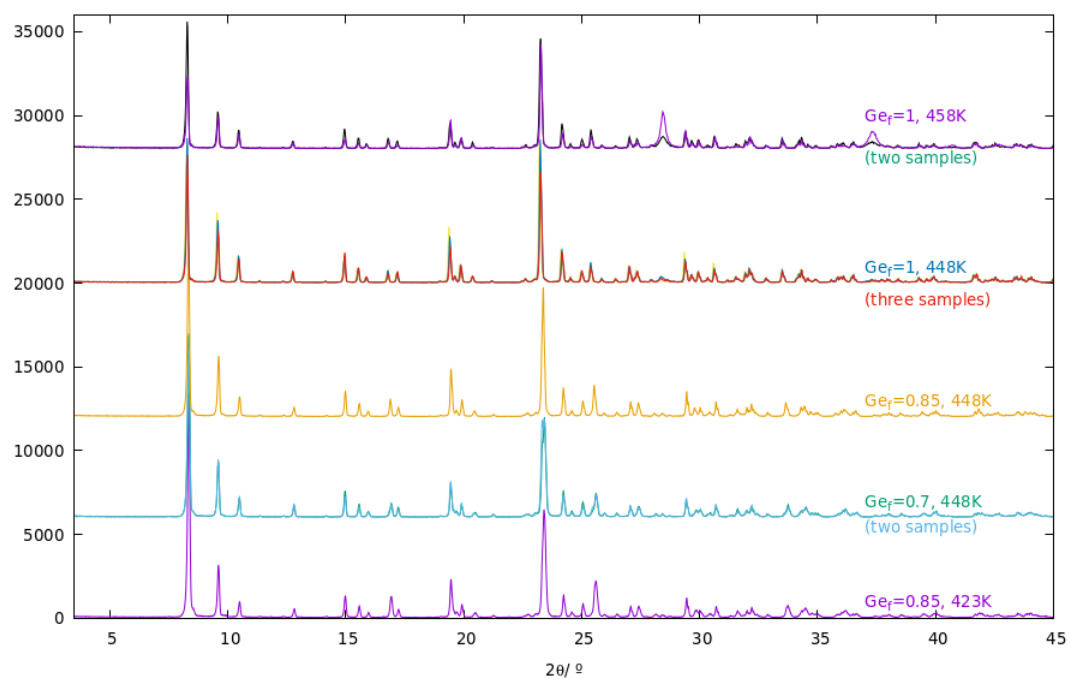

Figure S6. PXRD of **UOS** zeolite samples prepared at different  $Ge_f$  in the gel and at three different temperatures and identified as HPM-6.

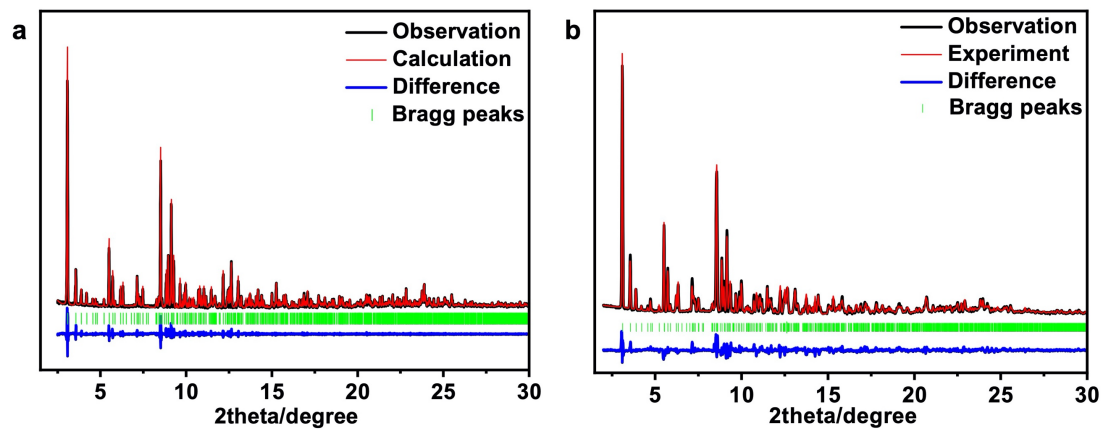

Figure S7. Rietveld refinement plots of HPM-6 (left:  $Ge_i=1$ , right:  $Ge_i=0.88$ ) in space group *Pbcm*. Wavelength= 0.56383Å.

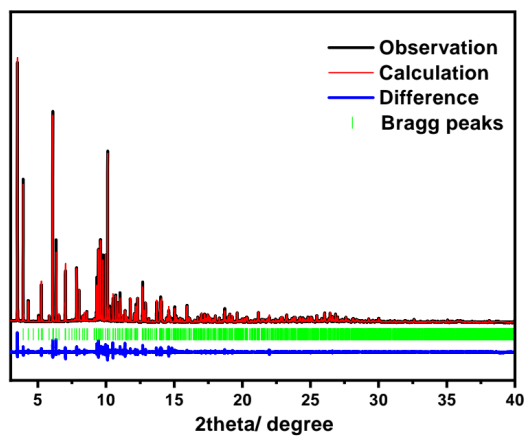

Figure S8. Rietveld refinement plots of HPM-11 ( $Ge_i=0.58$ ) in space group *Pbcm*. Wavelength= 0.61928Å.

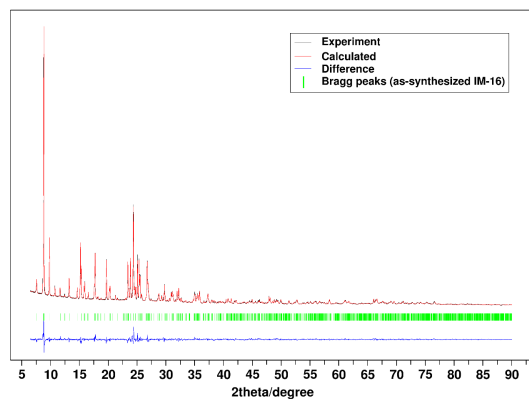

Figure S9. Rietveld refinement plots of as-made IM-16 ( $Ge_i=0.43$ ) in space group *P2<sub>1</sub>/m*. Wavelength=1.5406Å.

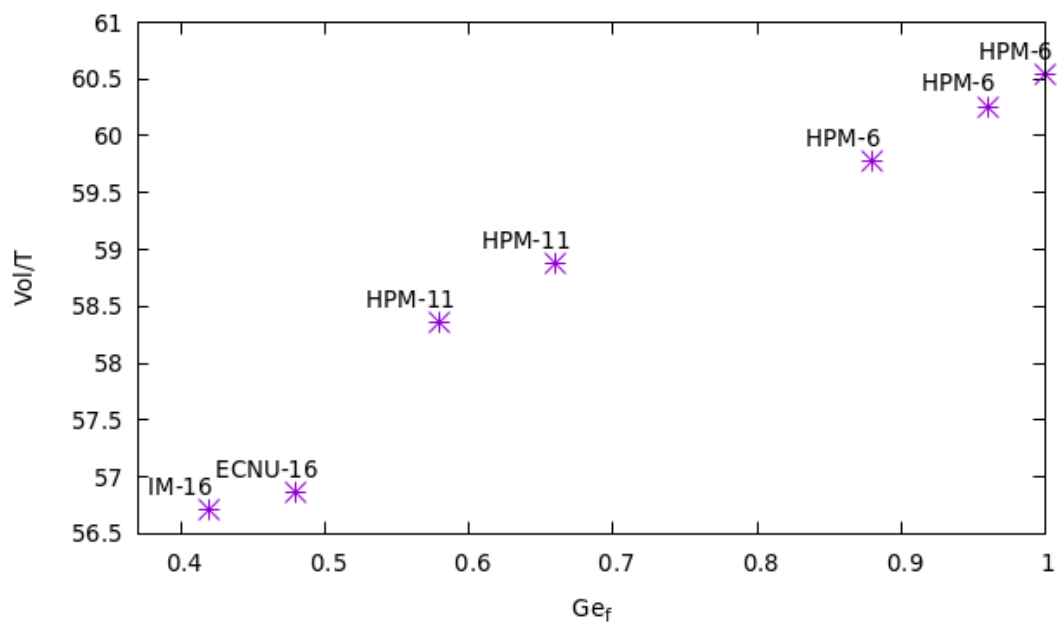

Figure S10. Variation of unit cell volume as a function of  $Ge_f$  for several **UOS** (and the related ECNU-16, **EOS**) zeolite phases. HPM-6 and HPM-11 are prepared with the same OSDA (2iPr13DMI) while IM-16 and ECNU-16 are each prepared with different ones.



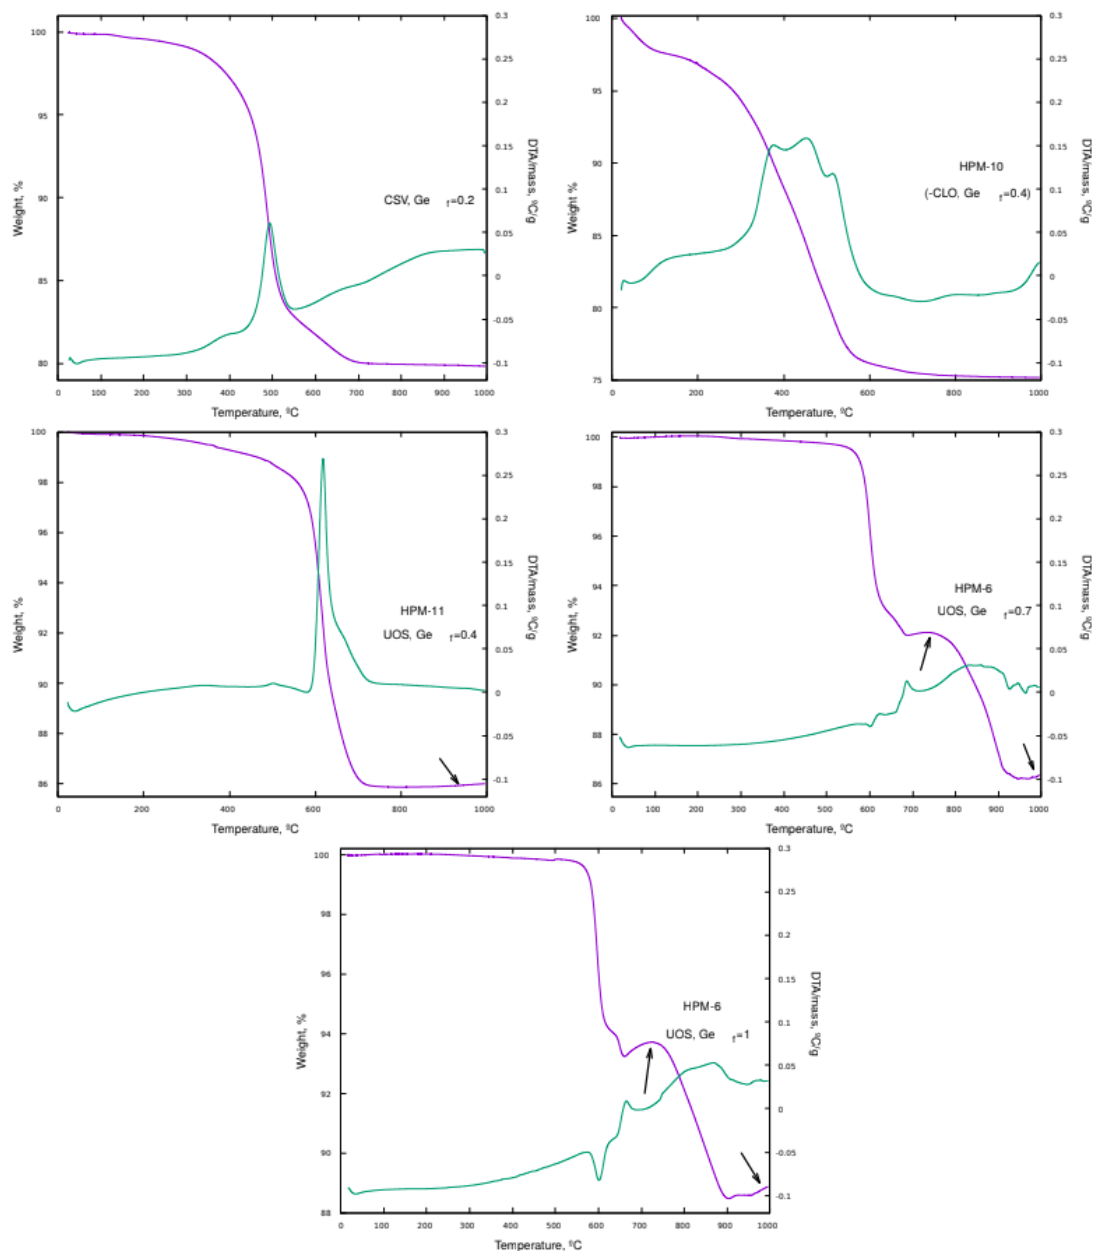

Figure S11. Thermogravimetric (purple traces) and mass normalized differential thermal analysis traces (green) of the pure germanosilicates synthesized in this work. Note the weight gaining events observed in some cases (arrows), which evidence reoxidation of previously organothermally reduced framework germanium oxide [ref. 47 in main text]. The DTA axis range is kept constant to ease comparison.

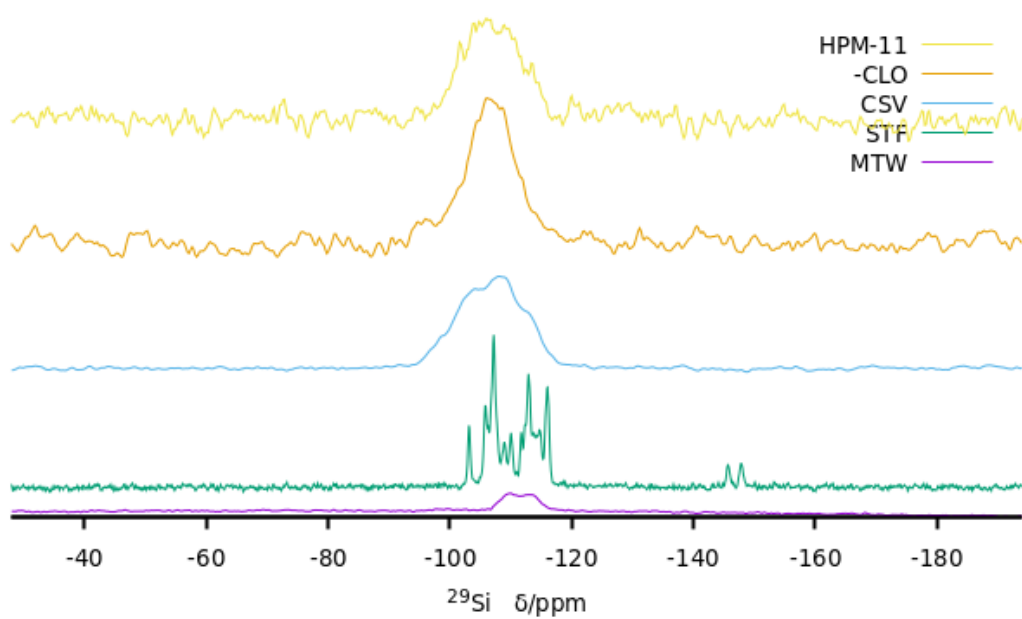

Figure S12.  $^{29}\text{Si}$  MAS NMR of zeolites with increasing  $\text{Ge}_t$ : ZSM-12 (**MTW**), SSZ-35 (**STF**), CIT-7 (**CSV**), HPM-10 (**-CLO**) and HPM-11 (**UOS**) (from bottom).

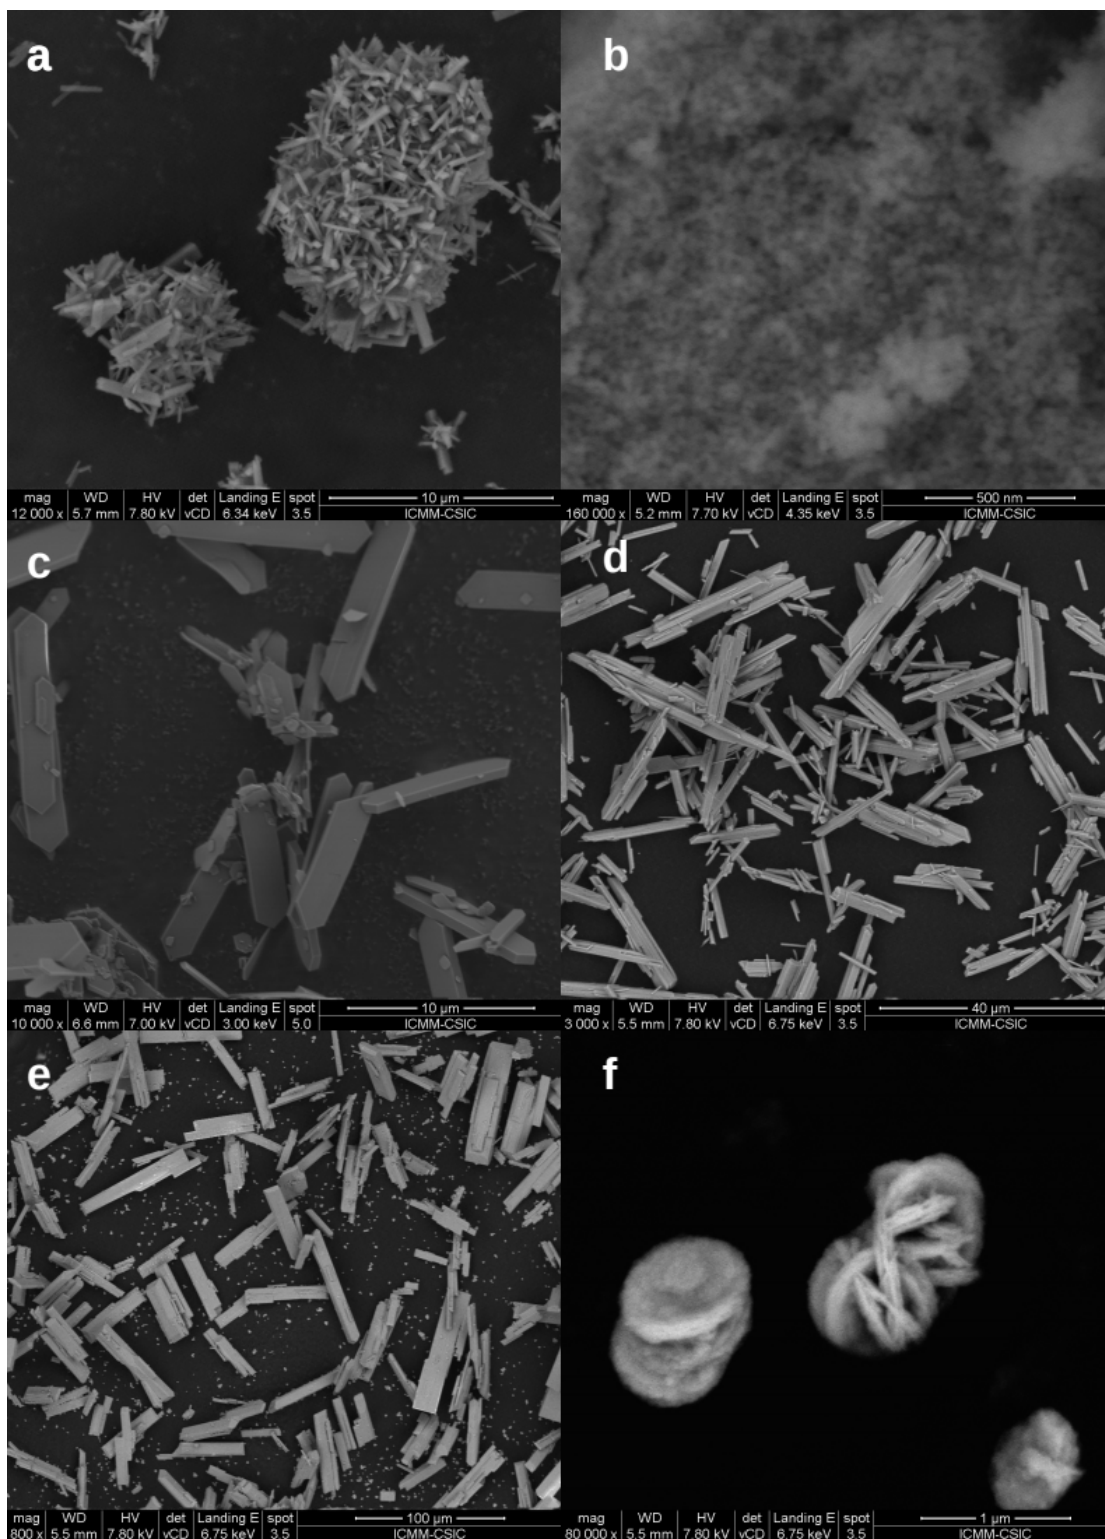

Figure S13. FESEM pictures of germanosilicates (Ge, indicated in parenthesis, first in gel, then in solid) from top left to bottom right: CIT-7, **CSV** (0.09, 0.09); HPM-10, **-CLO** (0.4, 0.42), c) HPM-11 (**UOS**, 0.4, 0.58), d) HPM-6 (**UOS**, 0.7, 0.88), e) HPM-6 (**UOS**, 1.0, 1.0). The detail in f) corresponds to the small size impurity observed in e).

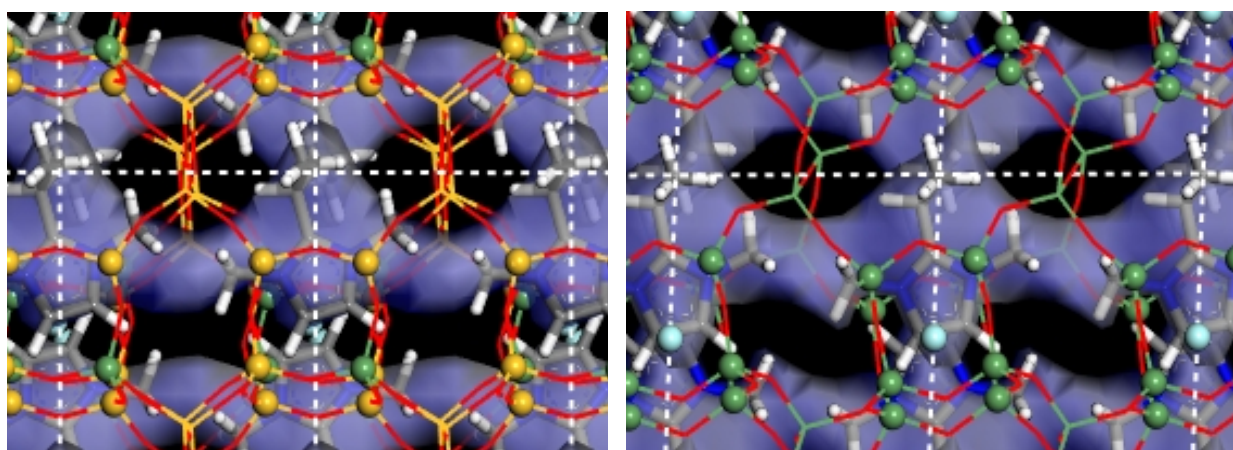

Figure S14. DFT-geometry optimized structure of 2iPr13DMI in the **UOS** frameworks for  $Ge_x$  of 0.33 (left) and 1 (right). Void volume is shown as transparent blue surface to facilitate pore visualization. Si and Ge atoms are displayed in yellow and green, respectively; atoms in the D4Rs are displayed as balls.

Table S1. CHN analysis of an OSDA synthesized by method A

| %C    | %H   | %N    | C/N     | H/N       | I/N <sup>a</sup> |
|-------|------|-------|---------|-----------|------------------|
| 35.70 | 5.53 | 10.58 | 3.94(4) | 7.26(7.5) | 0.50(0.5)        |

<sup>a</sup>Iodine content determined by difference

Table S2. Summary of zeolite synthesis results using the OSDA obtained by method A or B

| Method | Ge <sub>r</sub> | H <sub>2</sub> O/SiO <sub>2</sub> | Temp. (K)        | Time (days) | Phase <sup>a</sup>                              |
|--------|-----------------|-----------------------------------|------------------|-------------|-------------------------------------------------|
| A      | 0               | 3.2                               | 423              | 6           | ZSM-12 (+ K <sub>2</sub> SiF <sub>6</sub> )     |
| A      | 0               | 4.3                               | 423              | 3           | ZSM-12 + <u>Am.</u>                             |
| A      | 0               | 4.3                               | 423              | 6           | ZSM-12 (+ K <sub>2</sub> SiF <sub>6</sub> )     |
| A      | 0               | 4.3                               | 423 <sup>b</sup> | 6           | ZSM-12 + <u>Am.</u>                             |
| A      | 0               | 6.5                               | 423              | 13          | ZSM-12 (+ C + K <sub>2</sub> SiF <sub>6</sub> ) |
| B      | 0               | 2.9                               | 423              | 3           | <u>Am.</u>                                      |
| B      | 0               | 2.9                               | 423              | 5           | <u>Am.</u>                                      |
| B      | 0               | 2.9                               | 423              | 12          | <u>Am.</u> (+SSZ-35)                            |
| B      | 0               | 2.9                               | 423              | 16          | <u>Am.</u> (+SSZ-35)                            |
| B      | 0               | 2.9                               | 423              | 22          | SSZ-35                                          |
| B      | 0               | 2.9                               | 423              | 30          | SSZ-35 (+ ZSM-12)                               |
| B      | 0               | 3                                 | 448              | 5           | SSZ-35 (+T)                                     |
| B      | 0               | 3                                 | 448              | 21          | T (+SSZ-35)                                     |
| B      | 0               | 3.2                               | 448              | 3           | SSZ-35                                          |
| B      | 0               | 3.2                               | 448              | 6           | SSZ-35                                          |
| B      | 0               | 6.7                               | 448              | 6           | ZSM-12 (+SSZ-35)                                |
| B      | 0               | 6.7                               | 448              | 8           | ZSM-12                                          |
| B      | 0               | 6.7                               | 448              | 9           | ZSM-12                                          |
| B      | 0.4             | 4                                 | 423              | 1           | HPM-10                                          |
| B      | 0.4             | 4                                 | 423              | 2           | HPM-10                                          |
| B      | 0.4             | 4                                 | 423              | 7           | HPM-10                                          |
| B      | 0.4             | 4                                 | 423              | 13          | HPM-10                                          |
| B      | 0.85            | 4                                 | 423              | 1           | HPM-6 (+U)                                      |
| B      | 0.85            | 4                                 | 423              | 2           | HPM-6 (+U)                                      |

|   |       |   |     |    |                 |
|---|-------|---|-----|----|-----------------|
| B | 0.85  | 4 | 423 | 6  | HPM-6           |
| B | 1     | 4 | 423 | 6  | Q               |
| B | 0.009 | 4 | 448 | 1  | SSZ-35          |
| B | 0.009 | 4 | 448 | 2  | SSZ-35          |
| B | 0.009 | 4 | 448 | 6  | SSZ-35          |
| B | 0.009 | 4 | 448 | 13 | SSZ-35          |
| B | 0.013 | 4 | 448 | 1  | SSZ-35          |
| B | 0.013 | 4 | 448 | 2  | SSZ-35          |
| B | 0.013 | 4 | 448 | 6  | SSZ-35          |
| B | 0.013 | 4 | 448 | 12 | SSZ-35          |
| B | 0.09  | 4 | 448 | 1  | CIT-7           |
| B | 0.09  | 4 | 448 | 2  | CIT-7 (+U)      |
| B | 0.09  | 4 | 448 | 6  | CIT-7           |
| B | 0.09  | 4 | 448 | 7  | CIT-7 (+U)      |
| B | 0.1   | 4 | 448 | 1  | CIT-7           |
| B | 0.1   | 4 | 448 | 2  | CIT-7 (+U)      |
| B | 0.1   | 4 | 448 | 6  | CIT-7           |
| B | 0.1   | 4 | 448 | 15 | CIT-7           |
| B | 0.2   | 4 | 448 | 1  | HPM-10 + Am.    |
| B | 0.2   | 4 | 448 | 2  | CIT-7 + HPM-10  |
| B | 0.2   | 4 | 448 | 6  | CIT-7           |
| B | 0.2   | 4 | 448 | 9  | CIT-7 (+ HPM-1) |
| B | 0.4   | 4 | 448 | 2  | HPM-10 + HPM-1  |
| B | 0.4   | 4 | 448 | 5  | HPM-10 + HPM-1  |
| B | 0.4   | 4 | 448 | 7  | HPM-10 + HPM-1  |
| B | 0.5   | 4 | 448 | 1  | HPM-10          |
| B | 0.5   | 4 | 448 | 2  | HPM-10          |
| B | 0.5   | 4 | 448 | 6  | HPM-10 + HPM-1  |
| B | 0.6   | 4 | 448 | 1  | HPM-10          |
| B | 0.6   | 4 | 448 | 2  | HPM-10          |
| B | 0.6   | 4 | 448 | 6  | HPM-10 + HPM-1  |

|   |      |   |     |    |                          |
|---|------|---|-----|----|--------------------------|
| B | 0.6  | 4 | 448 | 9  | HPM-10 + HPM-1 + HPM-6   |
| B | 0.7  | 4 | 448 | 1  | HPM-6 (+ HPM-1)          |
| B | 0.7  | 4 | 448 | 2  | HPM-6 (+ HPM-1)          |
| B | 0.7  | 4 | 448 | 6  | HPM-6                    |
| B | 0.7  | 4 | 448 | 15 | HPM-6                    |
| B | 0.85 | 4 | 448 | 1  | HPM-6 (+ HPM-1 + HPM-10) |
| B | 0.85 | 4 | 448 | 2  | HPM-6                    |
| B | 0.85 | 4 | 448 | 6  | HPM-6                    |
| B | 1    | 4 | 448 | 2  | HPM-6 + Q                |
| B | 1    | 4 | 448 | 3  | HPM-6 + Q                |
| B | 1    | 4 | 448 | 5  | HPM-6 (+ Q )             |
| B | 1    | 4 | 448 | 8  | HPM-6                    |
| B | 1    | 4 | 448 | 10 | HPM-6                    |
| B | 1    | 4 | 448 | 13 | HPM-6                    |
| B | 0.4  | 4 | 458 | 10 | HPM-11+CIT-7             |
| B | 0.4  | 4 | 458 | 12 | HPM-11+CIT-7             |
| B | 0.4  | 4 | 458 | 13 | HPM-11+CIT-7             |
| B | 0.4  | 4 | 458 | 17 | HPM-11+CIT-7             |
| B | 0.4  | 4 | 458 | 1  | HPM-10                   |
| B | 0.4  | 4 | 458 | 2  | HPM-10 (+ HPM-11)        |
| B | 0.4  | 4 | 458 | 6  | HPM-10 + HPM-11          |
| B | 0.4  | 4 | 458 | 13 | HPM-11 (+CIT-7)          |
| B | 0.5  | 4 | 458 | 1  | HPM-10                   |
| B | 0.5  | 4 | 458 | 2  | HPM-10 + HPM-1           |
| B | 0.5  | 4 | 458 | 6  | HPM-10 + HPM-1           |
| B | 0.6  | 4 | 458 | 1  | HPM-10                   |
| B | 0.6  | 4 | 458 | 2  | HPM-10 + HPM-1           |
| B | 0.6  | 4 | 458 | 6  | HPM-10 + HPM-1           |
| B | 1    | 4 | 458 | 5  | HPM-6 (+Arg)             |
| B | 1    | 4 | 458 | 8  | HPM-6 + Arg              |
| B | 1    | 4 | 458 | 11 | HPM-6 +Arg (+U)          |

|   |     |   |     |    |                 |
|---|-----|---|-----|----|-----------------|
| B | 0.4 | 4 | 468 | 5  | HPM-11          |
| B | 0.4 | 4 | 468 | 7  | HPM-11 (+ Arg)  |
| B | 0.4 | 4 | 468 | 9  | HPM-11 (+ Arg)  |
| B | 0.4 | 4 | 468 | 10 | HPM-11 (+ Arg)  |
| B | 0.5 | 4 | 468 | 3  | HPM-11 + HPM-10 |
| B | 0.5 | 4 | 468 | 5  | HPM-11 + HPM-10 |
| B | 0.6 | 4 | 468 | 3  | HPM-11          |
| B | 0.6 | 4 | 468 | 5  | HPM-11          |

<sup>a</sup>Major phases are listed first, very minor phases appear between parentheses. Am. = amorphous, T=Tridymite, C = Cristobalite, Q =quartz-like GeO<sub>2</sub> , Arg=argutite-like GeO<sub>2</sub> , U=unknown

<sup>b</sup>Synthesis in static conditions.



Table S3. Rietveld refinement for HPM-6.

|                                                        |                                                                                                               |                                                                                                                                     |
|--------------------------------------------------------|---------------------------------------------------------------------------------------------------------------|-------------------------------------------------------------------------------------------------------------------------------------|
| Ge <sub>r</sub>                                        | 1.0                                                                                                           | 0.88                                                                                                                                |
| Empirical formula                                      | Ge <sub>48</sub> O <sub>96</sub> (C <sub>8</sub> N <sub>2</sub> H <sub>15</sub> ) <sub>4</sub> F <sub>4</sub> | Ge <sub>42.17</sub> Si <sub>5.83</sub> O <sub>96</sub> (C <sub>8</sub> N <sub>2</sub> H <sub>15</sub> ) <sub>4</sub> F <sub>4</sub> |
| Wavelength                                             | 0.56383Å                                                                                                      | 0.56383Å                                                                                                                            |
| Radiation                                              | Synchrotron Radiation                                                                                         | Synchrotron Radiation                                                                                                               |
| Crystal system                                         | Orthorhombic                                                                                                  | Orthorhombic                                                                                                                        |
| Space group                                            | <i>Pbcm</i>                                                                                                   | <i>Pbcm</i>                                                                                                                         |
| Unit cell dimensions                                   | a= 7.6816(6)Å<br>b= 18.1027(2) Å<br>c= 20.8952(9)Å                                                            | a = 7.6604(7)Å<br>b= 18.0784(8)Å<br>c = 20.7216(7)Å                                                                                 |
| Volume                                                 | 2905.68(1) Å <sup>3</sup>                                                                                     | 2869.73(8)Å <sup>3</sup>                                                                                                            |
| Z                                                      | 1                                                                                                             | 1                                                                                                                                   |
| 2θ range for data refinement                           | 1.5° < 2θ < 30°                                                                                               | 1.5° < 2θ < 30°                                                                                                                     |
| Number of parameters                                   | 96                                                                                                            | 84                                                                                                                                  |
| Number of reflections                                  | 2600                                                                                                          | 2600                                                                                                                                |
| Number of data points                                  | 7305                                                                                                          | 7305                                                                                                                                |
| Number of restrains                                    | 24 for T-O and for 49 O-T-O and T-O-T (T=Si/Ge)                                                               | 24 for T-O and for 49 O-T-O and T-O-T (T=Si/Ge)                                                                                     |
| Refinement method                                      | Rietveld refinement                                                                                           | Rietveld refinement                                                                                                                 |
| R <sub>p</sub> /R <sub>wp</sub> /R <sub>exp</sub> /Gof | 0.0778/0.1096/0.0363/1.35                                                                                     | 0.0483/0.0666/0.0145/1.56                                                                                                           |

Table S4. T-O bond distances (Å) for HPM-6 (T=Si and Ge).

| Ge <sub>r</sub> =1 |        |         |        | Ge <sub>r</sub> =0.88 |        |         |        |
|--------------------|--------|---------|--------|-----------------------|--------|---------|--------|
| T01-O08            | 1.6962 | T04-O04 | 1.7037 | T01-O08               | 1.6750 | T04-O04 | 1.6905 |
| T01-O03            | 1.7076 | T04-O02 | 1.7004 | T01-O03               | 1.6778 | T04-O02 | 1.6904 |
| T01-O06            | 1.7146 | T04-O09 | 1.6923 | T01-O06               | 1.6981 | T04-O09 | 1.6947 |
| T01-O09            | 1.6943 | T04-O13 | 1.7150 | T01-O09               | 1.6918 | T04-O13 | 1.7038 |
| T02-O01            | 1.7236 | T05-O04 | 1.6907 | T02-O01               | 1.7044 | T05-O04 | 1.6866 |
| T02-O05            | 1.7204 | T05-O05 | 1.7118 | T02-O05               | 1.7100 | T05-O05 | 1.7053 |
| T02-O07            | 1.7127 | T05-O12 | 1.7446 | T02-O07               | 1.7118 | T05-O12 | 1.7115 |
| T02-O06            | 1.7147 | T05-O11 | 1.6939 | T02-O06               | 1.6937 | T05-O11 | 1.6848 |
| T03-O01            | 1.7291 | T06-O02 | 1.7043 | T03-O01               | 1.7004 | T06-O02 | 1.6895 |
| T03-O10            | 1.6999 | T06-O07 | 1.7161 | T03-O10               | 1.6947 | T06-O07 | 1.7161 |
| T03-O11            | 1.6947 | T06-O10 | 1.6959 | T03-O11               | 1.6846 | T06-O10 | 1.7017 |
| T03-O08            | 1.6839 | T06-O12 | 1.7403 | T03-O08               | 1.6728 | T06-O12 | 1.7124 |

Table S5. Bond angles for HPM-6 (T=Si and Ge).

| Ge <sub>r</sub> =1 | Ge <sub>r</sub> =0.88 |
|--------------------|-----------------------|
|--------------------|-----------------------|

| Bond Angles (°) | Min   | Max   | Bond Angles (°) | Min   | Max   |
|-----------------|-------|-------|-----------------|-------|-------|
| T-O-T           | 131.7 | 151.9 | T-O-T           | 130.6 | 152.8 |
| O-T-O           | 107.5 | 111.6 | O-T-O           | 107.5 | 111.6 |

Table S6. Rietveld refinement for HPM-11.

|                                                                                    |                                                                                                                                      |
|------------------------------------------------------------------------------------|--------------------------------------------------------------------------------------------------------------------------------------|
| Empirical formula                                                                  | Ge <sub>24.44</sub> Si <sub>23.56</sub> O <sub>48</sub> (C <sub>8</sub> N <sub>2</sub> H <sub>15</sub> ) <sub>4</sub> F <sub>4</sub> |
| Wavelength                                                                         | 0.61928Å                                                                                                                             |
| Radiation                                                                          | Synchrotron Radiation                                                                                                                |
| Crystal system                                                                     | Orthorhombic                                                                                                                         |
| Space group                                                                        | <i>Pbcm</i>                                                                                                                          |
| Unit cell dimensions                                                               | a= 7.6212(9)Å<br>b= 18.1181 (2) Å<br>c= 20.2859 (7)Å                                                                                 |
| Volume                                                                             | 2801.14(7) Å <sup>3</sup>                                                                                                            |
| Z                                                                                  | 1                                                                                                                                    |
| 2θ range for data refinement                                                       | 3° < 2θ < 40°                                                                                                                        |
| Number of parameters                                                               | 96                                                                                                                                   |
| Number of reflections                                                              | 2044                                                                                                                                 |
| Number of data points                                                              | 12333                                                                                                                                |
| Number of restraints                                                               | 24 for T-O and for 49 O-T-O and T-O-T (T=Si/Ge)                                                                                      |
| Refinement method                                                                  | Rietveld refinement                                                                                                                  |
| <i>R<sub>p</sub></i> / <i>R<sub>wp</sub></i> / <i>R<sub>exp</sub></i> / <i>Gof</i> | 0.0975/0.1542/0.0316/1.87                                                                                                            |

Tab. S7. T-O bond distances (Å) for HPM-11 (T=Si or Ge).

|        |        |        |        |        |        |
|--------|--------|--------|--------|--------|--------|
| T1-O1  | 1.6648 | T3-O7  | 1.6542 | T5-O9  | 1.6285 |
| T1-O3  | 1.6721 | T3-O4  | 1.6648 | T5-O12 | 1.6059 |
| T1-O11 | 1.6864 | T3-O11 | 1.6667 | T5-O5  | 1.6484 |
| T1-O8  | 1.6819 | T3-O5  | 1.6867 | T5-O1  | 1.6142 |
| T2-O8  | 1.6697 | T4-O10 | 1.6867 | T6-O13 | 1.6166 |
| T2-O7  | 1.6593 | T4-O3  | 1.6671 | T6-O2  | 1.6455 |
| T2-O10 | 1.6751 | T4-O4  | 1.6638 | T6-O9  | 1.6241 |
| T2-O2  | 1.6908 | T4-O6  | 1.6717 | T6-O6  | 1.6208 |

Tab. S8. Bond angles for HPM-11 (T=Si-Ge).

| Bond Angles (°) | Min   | Max   |
|-----------------|-------|-------|
| T-O-T           | 138.2 | 180.0 |
| O-T-O           | 106.1 | 111.1 |

Table S9. Rietveld refinement parameters for as-synthesized IM-16.

|                                           |                                                                                                       |
|-------------------------------------------|-------------------------------------------------------------------------------------------------------|
| Refined chemical formula                  | $\text{Ge}_{10.369}\text{Si}_{13.631}\text{O}_{48}(\text{C}_{12}\text{N}_4\text{H}_{22})_2\text{F}_2$ |
| Wavelength (CuK $\alpha_1$ )              | 1.5406 Å                                                                                              |
| Crystal system                            | Monoclinic                                                                                            |
| Space group                               | $P2_1/m$                                                                                              |
| Unit cell dimensions                      | $a = 11.8269(2)$ Å<br>$b = 19.9543(2)$ Å<br>$c = 11.7185(3)$ Å<br>$\beta = 99.710(1)^\circ$           |
| Volume                                    | $V = 2725.91(4)$ Å <sup>3</sup>                                                                       |
| Z                                         | 2                                                                                                     |
| 2 $\theta$ range for data refinement      | $1.5^\circ < 2\theta < 90^\circ$                                                                      |
| Number of parameters                      | 202                                                                                                   |
| Number of reflections                     | 2295                                                                                                  |
| Number of data points                     | 9994                                                                                                  |
| Number of restraints                      | 224 (86 bonds, 138 angles)                                                                            |
| Refinement method                         | Rietveld refinement (GSAS2)                                                                           |
| $R_p/R_{wp}/R_{exp}/R_F/R_F^2/\text{Gof}$ | 0.052/ 0.069/ 0.032/0.039/0.067/2.339                                                                 |

Table S10. T-O bond distances (Å) for IM-16 (T=Si or Ge).

|        |            |        |            |         |            |
|--------|------------|--------|------------|---------|------------|
| T1-O1  | 1.706 (12) | T5-O8  | 1.622 (12) | T9-O3   | 1.596 (13) |
| T1-O2  | 1.660 (12) | T5-O13 | 1.644 (12) | T9-O14  | 1.636 (12) |
| T1-O10 | 1.664 (12) | T5-O16 | 1.647 (13) | T9-O17  | 1.705 (12) |
| T1-O15 | 1.676 (12) | T5-O23 | 1.657 (12) | T9-O25  | 1.658 (12) |
| T2-O1  | 1.714 (12) | T6-O10 | 1.668 (12) | T10-O6  | 1.689 (13) |
| T2-O6  | 1.696 (12) | T6-O11 | 1.676 (12) | T10-O18 | 1.612 (12) |
| T2-O8  | 1.649 (12) | T6-O17 | 1.713 (12) | T10-O19 | 1.605 (12) |
| T2-O9  | 1.641 (13) | T6-O23 | 1.639 (12) | T10-O24 | 1.613 (12) |
| T3-O2  | 1.589 (12) | T7-O7  | 1.630 (12) | T11-O9  | 1.565 (13) |
| T3-O3  | 1.560 (12) | T7-O11 | 1.656 (12) | T11-O20 | 1.611 (12) |
| T3-O4  | 1.758 (8)  | T7-O12 | 1.647 (12) | T11-O21 | 1.644 (12) |
| T3-O5  | 1.644 (12) | T7-O20 | 1.616 (12) | T11-O22 | 1.743 (6)  |
| T4-O5  | 1.647 (12) | T8-O12 | 1.652 (12) | T12-O13 | 1.638 (12) |
| T4-O7  | 1.639 (12) | T8-O14 | 1.642 (12) | T12-O21 | 1.638 (12) |
| T4-O16 | 1.629 (12) | T8-O15 | 1.701 (12) | T12-O24 | 1.635 (12) |
| T4-O19 | 1.618 (12) | T8-O18 | 1.594 (12) | T12-O25 | 1.678 (12) |

Tab. S11. Bond angles for IM-16 (T=Si-Ge).

| Bond Angles (°) | Min   | Max   |
|-----------------|-------|-------|
| T-O-T           | 129.2 | 155.0 |
| O-T-O           | 101.1 | 118.5 |
